# Supplementary material
Source: PubMed Central journal article supplement (PMC4616931)
Supplement: AEM.01367-15_zam999116690so1.pdf [file AEM.01367-15_zam999116690so1.pdf]

1 **Supplementary Information**

2 **Figure S1** The gene copies of **A) tet genes**, **B) sul genes**, **C) qnr genes** and **D) 16S rRNA** normalized to dry weight of samples. The samples were  
 3 collected on day 0 (C-0), day 3 (C-3), and day 6 (C-6) random stockpiling of raw fresh manure as controls and on day 1 (T-1), day 3 (T-3), day 5  
 4 (T-5), and day 6 (T-6) housefly larvae (*Musca domestica*) vermicomposting of raw fresh manure as the treatment. Error bars are standard  
 5 deviations (n = 3). Different letters listed above error bars indicate significant ( $p < 0.05$ ) differences in gene copies of ARGs and 16S rRNA  
 6 between different vermicomposting days and controls using S-N-K test for multiple comparison, following a significant One-way  
 7 repeated-measures ANOVA.

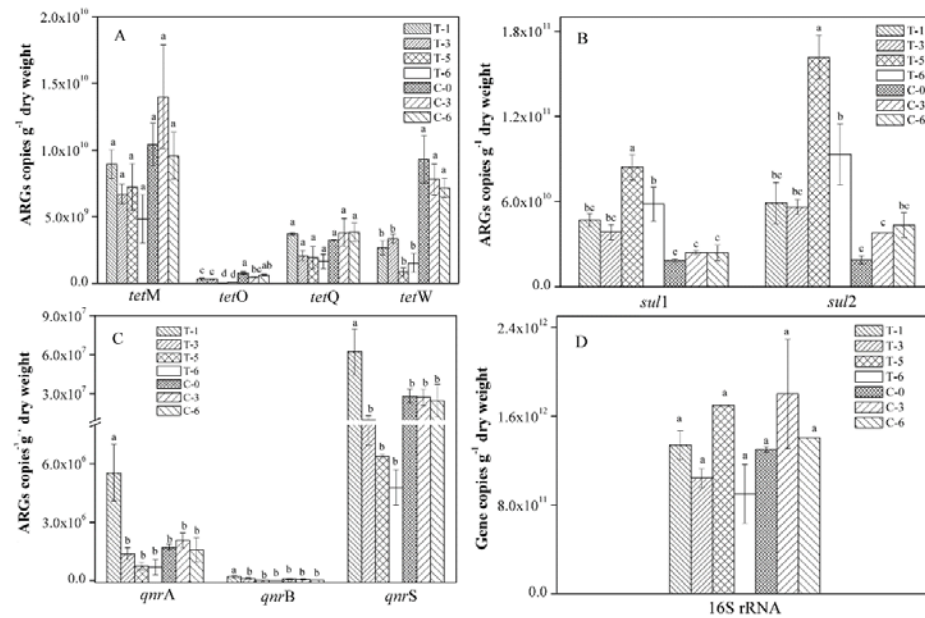

9 **Table S1** The selected environmental factors measured in samples collected in unprocessed fresh manure (C-0), in manure under traditional  
 10 composting without larvae on day 3 (C-3), and day 6 (C-6), and in manure under larvae-treated vermicomposting on day 1 (T-1), day 3 (T-3),  
 11 day 5 (T-5), and day 6 (T-6). Standard deviations of the mean are presented in brackets (n = 3). Various colors per row represent significant  
 12 differences in these parameters at 0.05 levels among different sampling times.

|                    | T-1         | T-3         | T-5         | T-6         | C-0         | C-3         | C-6         |
|--------------------|-------------|-------------|-------------|-------------|-------------|-------------|-------------|
| Organic matter (%) | 90.8 (0.5)  | 89.1 (0.7)  | 82.38 (1.1) | 84.2 (0.5)  | 91.1 (1.4)  | 90.3 (1.1)  | 89.4 (1.0)  |
| Total nitrogen (%) | 3.35 (0.06) | 3.25 (0.08) | 2.98 (0.03) | 2.60 (0.03) | 3.48 (0.07) | 3.77 (0.29) | 3.61 (0.14) |
| pH                 | 6.51 (0.08) | 8.34 (0.00) | 8.68 (0.03) | 8.46 (0.04) | 6.68 (0.03) | 6.73 (0.06) | 6.73 (0.04) |
| Temperature (°C)   | 31.7 (0.6)  | 36.7 (1.5)  | 47.7 (0.6)  | 33.0 (2.6)  | 28.3 (0.6)  | 29.0 (1.0)  | 30.6 (0.1)  |
| Water content (%)  | 71.7 (0.8)  | 71.7 (2.5)  | 64.6 (1.6)  | 65.9 (1.8)  | 81.4 (2.2)  | 79.4 (2.7)  | 79.6 (2.4)  |

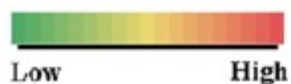

13  
14
